# Supplementary material
Source: PubMed Central journal article supplement (PMC2993392)
Supplement: 1009000107_pnas.1009000107_SI.pdf [file 1009000107_pnas.1009000107_SI.pdf]

# Supporting Information

Kim et al. 10.1073/pnas.1009000107

## SI Materials and Methods

**Flow Cytometry (FACS).** For FACS analysis, cells were collected by trypsinization, washed once with PBS, and fixed with cold 70% ethanol. After overnight fixation at  $-20^{\circ}\text{C}$ , cells were washed with PBS and permeabilized with a 5-min incubation in PBS plus 0.25% (v/v) Triton X-100. Cells were then incubated with  $\alpha$ -MPM2 (Millipore) followed by an incubation with fluorescent secondary antibodies (Invitrogen) diluted in PBS plus 1% BSA. After washing with PBS, the cells were stained with propidium iodide (Sigma) at a final concentration of 20  $\mu\text{g}/\text{ml}$ ; and simultaneously treated with 200  $\mu\text{g}/\text{ml}$  RNAase A (Qiagen). The flow cytometry reading was performed with FacsScan (Becton Dickinson). The results were analyzed with the FlowJo software (Tree Star).

**Metabolic  $^{32}\text{P}$  Labeling.** About  $6 \times 10^5$  HeLa Tet-On cells were transfected with pCS2-Myc Mad2-wt or Mad2<sup>S195A</sup> for 22 hrs and treated with nocodazole for another 14 hrs. The cells were then released into the labeling medium (phosphate-depleted DMEM plus 5% dialyzed FBS) for 2 hrs followed by another 2-hr incubation in the labeling medium plus  $^{32}\text{P}$ -orthophosphate (0.3–0.5 mCi/60-mm plate; PerkinElmer). The cells were then lysed with the RIPA buffer (1% NP-40, 1% sodium deoxycholate, 0.1% SDS, 10 mM sodium phosphate, pH 7.2, 2 mM EDTA, 50 mM sodium fluoride, 0.2 mM sodium vanadate, and 1X protease inhibitor cocktail). The Myc-Mad2 proteins were immuno-

precipitated from the cleared cell lysate with  $\alpha$ -Myc antibody (Roche), separated on SDS/PAGE, and transferred to a nitrocellulose membrane. The incorporation of  $^{32}\text{P}$  was measured with a phosphorimager (FLA-5100; Fujifilm). The same membrane was blotted with  $\alpha$ -Mad2 to compare the total amounts of precipitated proteins.

**Intein-mediated Protein Ligation.** The cDNA encoding the Mad2N fragment (residues 1–186) was amplified by PCR and cloned into pTXB1 (New England Biolabs) between the NdeI and SapI sites. Expression of pTXB1-Mad2N in BL21(DE3) produced Mad2N-intein-CBD fusion protein, which was bound to chitin beads. Chitin beads were washed with the ligation buffer (50 mM HEPES, pH 7.5, 250 mM NaCl). The ligation peptide containing residues 187–205 of Mad2, except that T187 was replaced with a cysteine and S195 with a phospho-serine, was chemically synthesized. The Mad2N-intein-CBD fusion protein on chitin beads was incubated with 1 mM ligation peptide and 60 mM 2-mercaptoethanesulfonic acid (MESNA) in the ligation buffer at room temperature overnight. The ligation product was eluted from the beads and further purified using anion exchange and size exclusion chromatography. Based on mass spectrometry, the final ligation product contained residues 2–205 of Mad2 with the expected T187C mutation and phospho-S195. The first methionine of Mad2N was presumably removed by bacterial aminopeptidases.

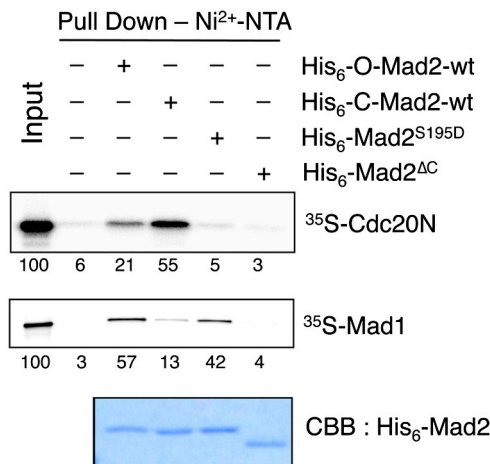

**Fig. S1.** Blank Ni<sup>2+</sup>-NTA beads or beads bound to the indicated His<sub>6</sub>-tagged Mad2 proteins were incubated with <sup>35</sup>S-labeled Mad1 or Cdc20N. After washing, the proteins retained on the beads were analyzed by SDS/PAGE followed by autoradiography. About 25% of the <sup>35</sup>S-labeled proteins used in the binding assays were loaded as input. Mad2 proteins bound to beads were also stained with Coomassie. The relative amounts of Mad1 or Cdc20N bound to beads were quantified.
